# TaqMan MGB Probe Fluorescence Real-Time Quantitative PCR for Rapid Detection of Chinese Sacbrood Virus

Ma Mingxiao<sup>1\*</sup>, Liu Jinhua<sup>2</sup>, Song Yingjin<sup>3</sup>, Li Li<sup>1</sup>, Li Yongfei<sup>1</sup>

**1** Department of Laboratory Animal Center, Liaoning Medical University, Jinzhou, China, **2** Jilin Entry-Exit Inspection and Quarantine Bureau, Changchun, China, **3** Agriculture and Biology Engineering College, Tianjin University, Tianjin, China

## Abstract

Sacbrood virus (SBV) is a picorna-like virus that affects honey bees (*Apis mellifera*) and results in the death of the larvae. Several procedures are available to detect Chinese SBV (CSBV) in clinical samples, but not to estimate the level of CSBV infection. The aim of this study was to develop an assay for rapid detection and quantification of this virus. Primers and probes were designed that were specific for CSBV structural protein genes. A TaqMan minor groove binder (MGB) probe-based, fluorescence real-time quantitative PCR was established. The specificity, sensitivity and stability of the assay were assessed; specificity was high and there were no cross-reactivity with healthy larvae or other bee viruses. The assay was applied to detect CSBV in 37 clinical samples and its efficiency was compared with clinical diagnosis, electron microscopy observation, and conventional RT-PCR. The TaqMan MGB-based probe fluorescence real-time quantitative PCR for CSBV was more sensitive than other methods tested. This assay was a reliable, fast, and sensitive method that was used successfully to detect CSBV in clinical samples. The technology can provide a useful tool for rapid detection of CSBV. This study has established a useful protocol for CSBV testing, epidemiological investigation, and development of animal models.

**Citation:** Mingxiao M, Jinhua L, Yingjin S, Li L, Yongfei L (2013) TaqMan MGB Probe Fluorescence Real-Time Quantitative PCR for Rapid Detection of Chinese Sacbrood Virus. PLoS ONE 8(2): e52670. doi:10.1371/journal.pone.0052670

**Editor:** Wenzhe Ho, Temple University School of Medicine, United States of America

**Received:** August 20, 2012; **Accepted:** November 19, 2012; **Published:** February 8, 2013

**Copyright:** © 2013 Mingxiao et al. This is an open-access article distributed under the terms of the Creative Commons Attribution License, which permits unrestricted use, distribution, and reproduction in any medium, provided the original author and source are credited.

**Funding:** This work was supported by grants from the National Natural Science Foundation of China (No. 30972200) and the Science and Technology Department of Liaoning Province of China (No. 2011408004). The funders had no role in study design, data collection and analysis, decision to publish.

**Competing Interests:** The authors have declared that no competing interests exist.

\* E-mail: nmx8@yahoo.com.cn

## Introduction

Sacbrood virus (SBV) is a picorna-like virus that affects the honey bee (*Apis mellifera*) and results in the death of the larvae [1]. Larvae that have been infected with SBV fail to pupate and ecdysial fluid, rich in SBV, accumulates beneath their unshed skin. Infected larvae change in color from white to pale yellow and then die. Shortly after death they dry out and form a distinctive dark brown gondola-shaped scale [2]. SBV causes a fatal infection in bee larvae, but may also infect the adult bee and infected workers may have decreased life spans [3,4]. When this infection occurs in adults, however, obvious physical signs of disease are lacking [3,5]. SBV infection occurs most frequently in the spring and this timing is believed to reflect the availability of susceptible larvae and young adults that are at their height in this season when the colony is growing most rapidly [3].

The SBV that infects the Chinese honeybee was named Chinese SBV (CSBV). CSBV was first described in Guangdong China in 1972, and re-emerged in Liaoning China in 2008 [6], when it caused lethal disease in individual bees or the collapse of entire colonies.

Several procedures have been utilized previously to detect CSBV. These methods include reverse transcriptase polymerase chain reaction (RT-PCR) [6,7] and loop-mediated isothermal amplification (LAMP) assay [8]. Although these techniques can be used to characterize CSBV in clinical samples, they cannot estimate the level of CSBV infection. The quantitation of CSBV would permit a better understanding of virus infection, both in individual bees and in the hive.

Real-time RT-PCR detection methods have been developed recently for the detection and quantitation of bee viruses [9–13]. This paper describes a TaqMan MGB (minor groove binder) probe fluorescence real-time quantitative PCR assay to quantify CSBV. Standard curves from a plasmid that contained a partial sequence of the CSBV genome were used to obtain an absolute quantitation of CSBV. The specificity, sensitivity and stability of the method were validated from a standard DNA curve. The established TaqMan MGB probe fluorescence real-time quantitative PCR assay was applied to detect CSBV in 37 clinic samples, and its efficiency was compared with that of clinic diagnosis, electron microscopy observation, and conventional RT-PCR assay.

## Materials and Methods

### Sample preparation, RNA extraction and cDNA synthesis

CSBV (CSBV-LNQY) was obtained from a natural outbreak in Liaoning China. Infected larvae/pupae were stored at  $-70^{\circ}\text{C}$  until required. Viral genomic RNA was extracted from the purified virus preparation using TRIzol reagent (Invitrogen, Carlsbad, California, USA). For purification of the virus, CSBV-infected larvae were homogenized in 5 ml NT buffer (100 mM NaCl, 10 mM Tris pH 7.4) and the macerate was clarified at 1000 *g* for 10 min. The supernatant was extracted with an equal volume of 1,1,2-trichlorotrifluoroethane and the aqueous phase was layered over a discontinuous CsCl gradient (1.5  $\text{g}/\text{cm}^3$  and 1.2  $\text{g}/\text{cm}^3$ ) and centrifuged at 270 000 *g* for 1 h in an SW50 rotor. The material at the CsCl interface was harvested and adjusted to

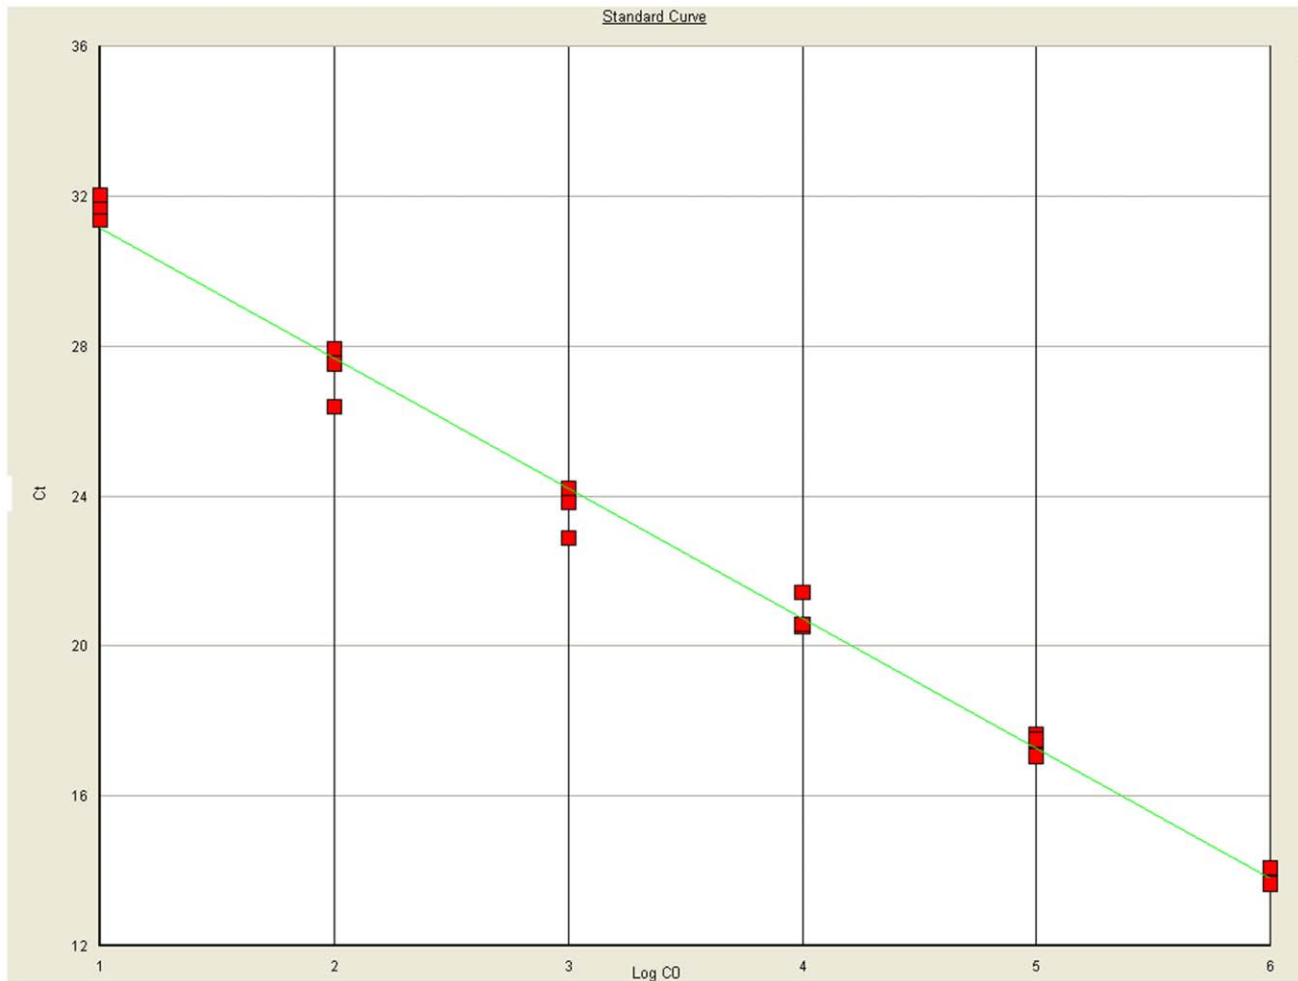

**Figure 1. Standard curve of *TaqMan* MGB probe real-time quantitative polymerase chain reaction (PCR) for Chinese sacbrood virus (CSBV).** DNA standard curves of CSBV *TaqMan* PCR assay using a FAM-MGB-labeled *TaqMan* probe obtained with a 10-fold serial dilution ( $5 \times 10^8$  to  $5 \times 10^3$  DNA copies) of a 3.1-kb plasmid that included a 320-bp fragment located in the CSBV VP1 gene. The standard curve was obtained by linear regression analysis of the  $C_T$  measured for each amplification (y-axis) vs. the log copy number for each standard dilution (x-axis). The slope of the standard curve ( $-3.47$ ) and the correlation coefficient are indicated  $r^2 = 0.99$  ( $Y = -3.47X + 34.60$ ). The red box represents  $C_T$ . doi:10.1371/journal.pone.0052670.g001

a volume of 5 ml (final density  $1.38 \text{ g/cm}^3$ ) with CsCl solution and centrifuged at  $270\,000 \text{ g}$  overnight. Two light-scattering bands were formed that were collected separately and diluted with NT buffer; virus was collected by sedimentation at  $270\,000 \text{ g}$  for 1 h. Pellets were resuspended in NT buffer. Complementary DNA (cDNA) was synthesized using  $12.5 \mu\text{l}$  of eluted RNA, oligo(dT)18 primer [14] and avian myeloblastosis virus (AMV) reverse transcriptase XL (TaKaRa, Dalian, China) according to the manufacturer's instructions.

#### Real-time quantitative PCR protocol by *TaqMan* MGB probe assay

Primer pairs and probes specific for CSBV were designed based on the nucleotide sequences of CSBV published previously in the GenBank database (accession no. AF469603 and HM237361.1). The primers and probes used for *TaqMan* MGB probe fluorescence real-time quantitative PCR were designed using the Primer5 software. The sequence of the forward primer is 5'-CCTGGGAAGTTTGCTAGTATTTACG-3' and of the reverse primer is 5'-CCTATCACATCCATCTGGGTCAG-3'. The *TaqMan* MGB probe sequence was 5'-CGACATACCCG-

CAAATTCAGCACGC-3', which was labeled with the fluorescent reporter dye FAM (6-carboxyfluorescein) at the 5' end and with the fluorescent NFQ-MGB at the 3' end. A 161-bp product was expected when these primers were used. The primers and the *TaqMan* MGB probes were synthesized and labeled by TaKaRa, Dalian, China.

TransStart<sup>TM</sup> Probe qPCR SuperMix (Beijing TransGen Biotech Co., Ltd.) was used for amplification by *TaqMan* PCR. The PCR reaction mixture contained 500 nM of each primer, 250 nM of the probe,  $2 \times$  PCR buffer  $12.5 \mu\text{l}$ , Reference  $0.5 \mu\text{l}$  and  $2 \mu\text{l}$  of standard template plasmid or cDNA in a  $25 \mu\text{l}$  total reaction volume. The thermal cycling conditions were 30 sec at  $95^\circ\text{C}$ , followed by 40 cycles that consisted of a denaturation step at  $95^\circ\text{C}$  for 5 sec, annealing and extension step at  $60^\circ\text{C}$  for 60 sec. The ABI Prism 7000 system (Applied Biosystems ABI) was used for amplification and detection.

#### Preparation of the plasmid DNA standard for calibration of the CSBV *TaqMan* MGB probe PCR assay

A standard DNA curve was generated with a 3.01 kb plasmid that was obtained by cloning a 320-bp PCR fragment located in

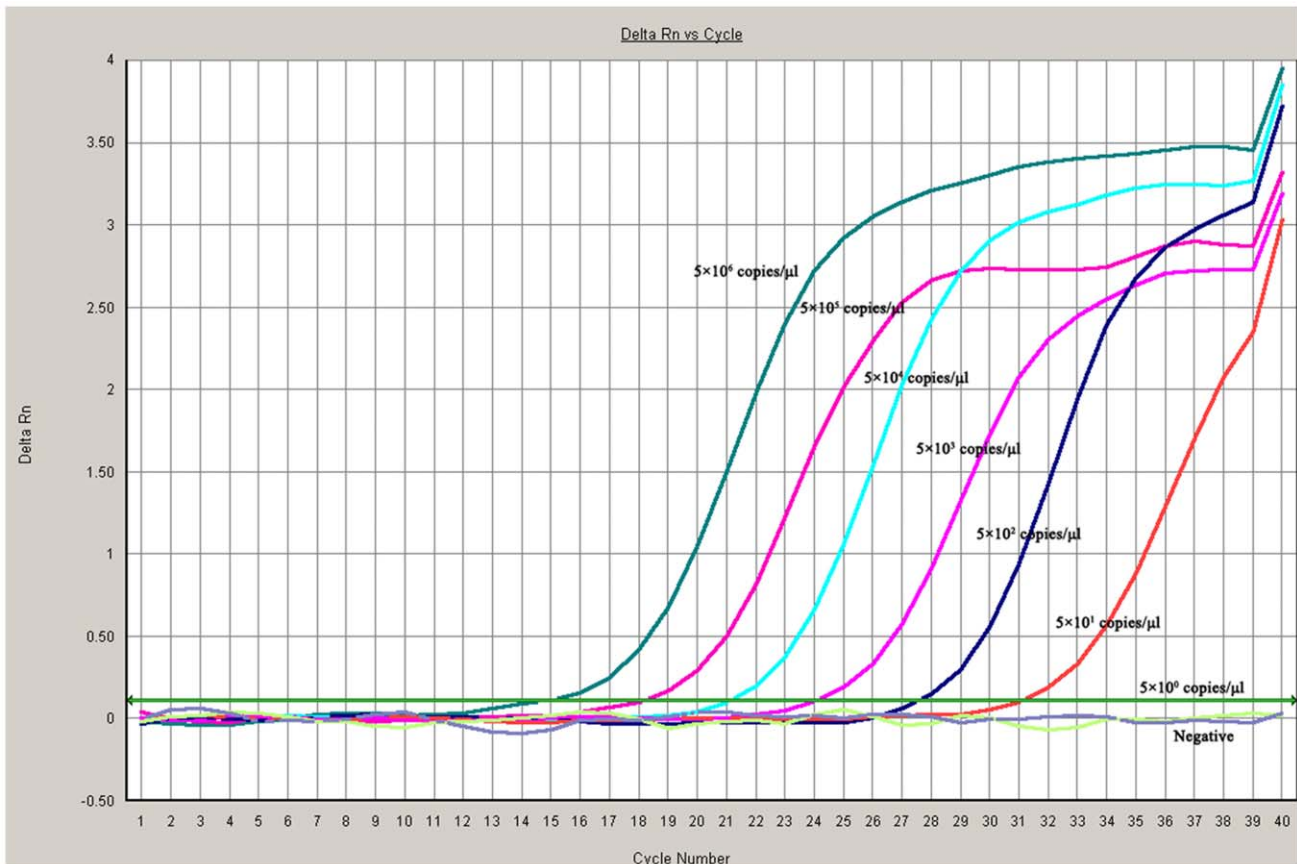

**Figure 2. Sensitivity of the *TaqMan* MGB probe real-time quantitative polymerase chain reaction (PCR) for Chinese sacbrood virus (CSBV).** To evaluate the sensitivity of the *TaqMan* MGB probe real-time RT-PCR assay. Amplification of seven 10-fold dilutions of DNA plasmid gave a titer that ranged from  $5 \times 10^6$  to  $5 \times 10^0$  DNA copies per reaction mixture. The reactions were performed in triplicate. The limit of detection of the *TaqMan* MGB probe real-time PCR was 50 CSBV genome equivalent copies. doi:10.1371/journal.pone.0052670.g002

the VP1 gene of CSBV into the pMD<sup>®</sup> 18-T Vector (TaKaRa, Dalian, China.). The plasmid was quantified based on the DNA concentration determined by UV (ultraviolet) light spectrometry; stock solutions were prepared in Tris-EDTA (TE) buffer that ranged in concentration from  $5 \times 10^8$  to 5 DNA copies per microliter. A standard DNA curve for the range of  $5 \times 10^8$  to  $5 \times 10^3$  DNA copies per reaction was generated by analysing 2  $\mu$ l of each dilution in triplicate by *TaqMan* PCR.

### Evaluation of the method

The limit of detection of the CSBV *TaqMan* PCR was determined by serial 10-fold dilution of the DNA standard prepared in triplicate.

The specificity of the CSBV *TaqMan* PCR was assessed by testing cDNAs generated from deformed wing virus (DWV), black queen cell virus (BQCV), acute bee paralysis virus (ABPV), and chronic bee paralysis virus (CBPV) isolates, which were provided by Professor Laurent Gauthier, healthy larvae and two positive samples were included as controls for the specific RT-PCR tests.

The reproducibility of the CSBV *TaqMan* PCR assay was demonstrated by evaluation of the variability of the  $C_T$  values obtained after amplification of 10-fold serial dilutions of the plasmid DNA standard ranging from  $10^2$  to  $10^6$  copies per reaction in triplicate during the same experiment.

### Validation of the CSBV *TaqMan* PCR method on clinical samples

Thirty-seven clinical samples collected from Qingyuan, Jinzhou, Tieling, Yingkou, Dalian and Liaozhong areas of Liaoning Province and Huinan Ji'an areas of Jilin Province, China from 2008 to 2011 were tested to determine the feasibility of the *TaqMan* PCR assay. At the same time, all mentioned samples were subjected to conventional RT-PCR and electron microscopy.

### Results

#### Standardisation of the CSBV *TaqMan* PCR assay

The assay was calibrated using a plasmid DNA control as a standard. The standard curve generated from the amplification plot of the 10-fold serial dilution experiment (Fig. 1) showed a linear correlation between  $C_T$  values and the DNA load over a 6-log range ( $r^2 = 0.99$ ). The slope of the DNA standard curve was 3.47, which indicated that the efficiency of the CSBV *TaqMan* PCR was 95%.

The limit of detection of the CSBV *TaqMan* PCR was 50 CSBV genome equivalent copies (Fig. 2); this result compared favourably with conventional PCR for which the limit of detection of CSBV genome from plasmid DNA control was  $5 \times 10^3$  copies (data not shown).

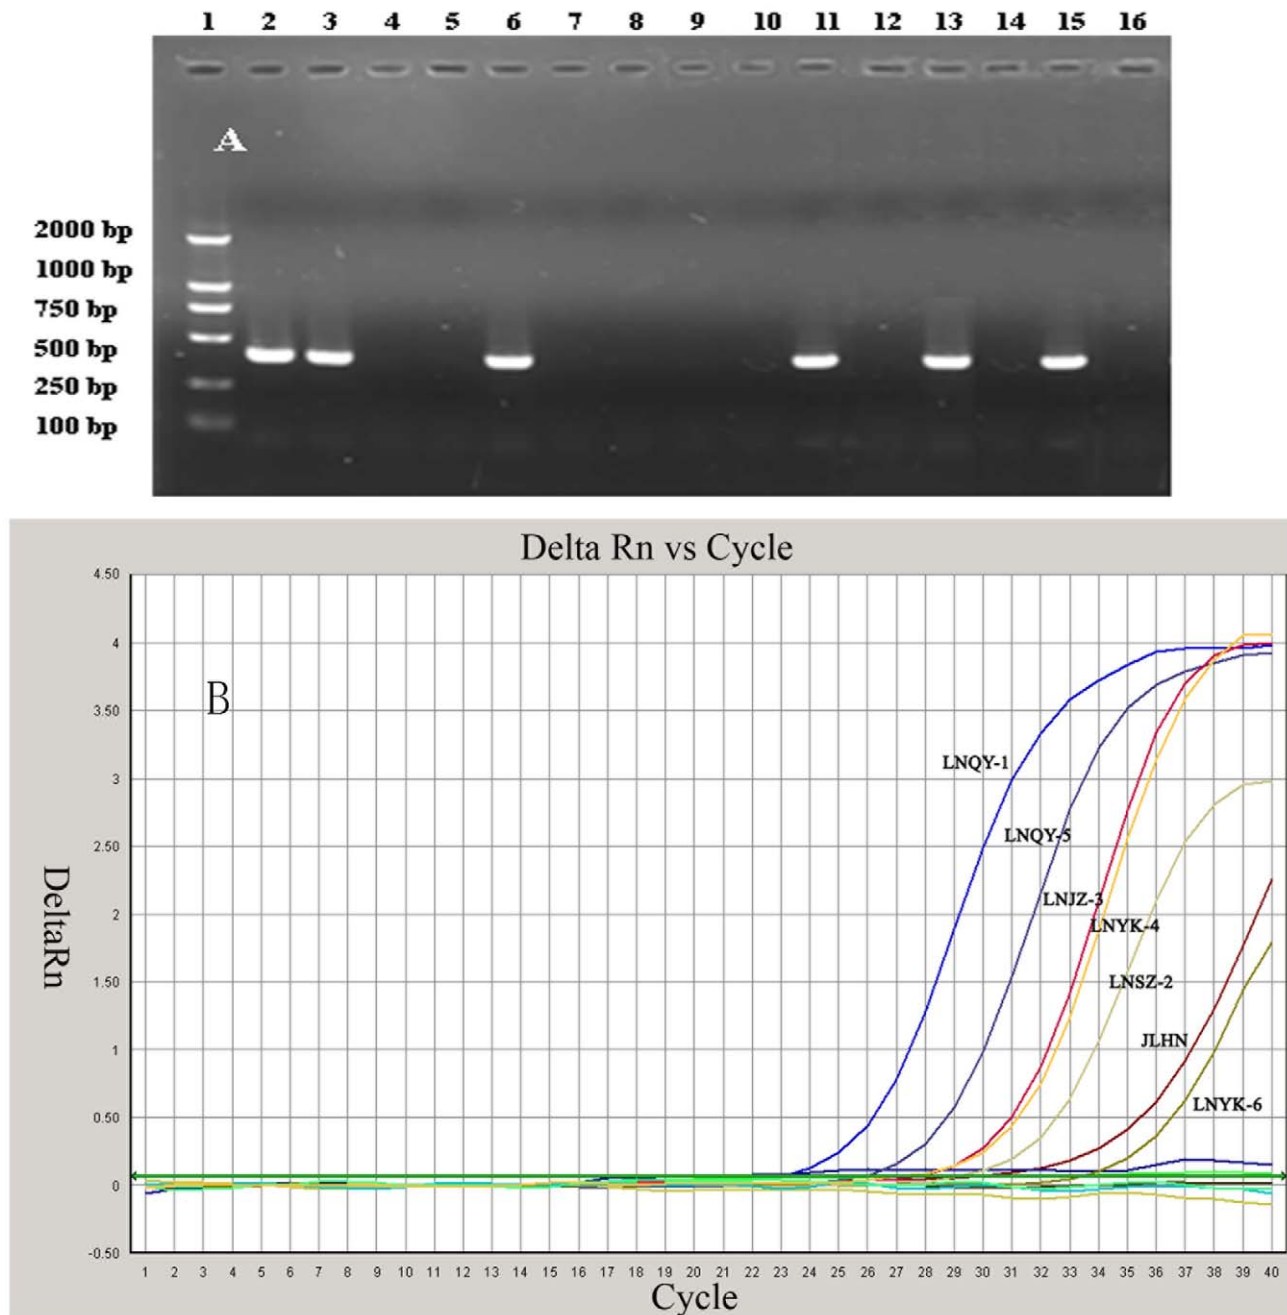

**Figure 3. Comparison of TaqMan PCR assay and reverse transcriptase polymerase chain reaction (RT-PCR) methods by testing collected clinical samples.** The 16 collected clinical samples were tested using the TaqMan RT-PCR and RT-PCR, respectively. (A) RT-PCR test results. (B) TaqMan RT-PCR test results. The LNQY-1, LNJZ-3, LNYK-4, JLHN, LNQY-5 and LNSZ-2 samples tested positive using conventional RT-PCR and the TaqMan RT-PCR method, but the LNYK-6 samples tested positive using the TaqMan RT-PCR method, however the samples were negative by electron microscopy and conventional RT-PCR. lane 1. DNA marker DL2000, lane 2. LNQY-1, lane 3. LNQY-5, lane 4. LNQY-2, lane 5. LNYK-3, lane 6. LNYK-4, lane 7. LNYK-6, lane 8. LNLZ-1, lane 9. LNLZ-3, lane 10. JLJA, lane 11. JLHN, lane 12. LNJZ-1, lane 13. LNJZ-3, lane 14. LNJZ-5, lane 15. LNSZ-2, lane 16. JLBC.  
doi:10.1371/journal.pone.0052670.g003

#### Specificity and reproducibility of the CSBV TaqMan PCR

CBPV specificity was confirmed by a BLAST search of the amplicon (116 bp) generated by *TaqMan* PCR. No significant similarity was found. Furthermore, no amplification was detected when these *TaqMan* PCR conditions were performed on cDNAs obtained from CBPV, ABPV, BQCV or DWV samples (Fig. 3). The coefficient of variation (CV) of the mean  $C_T$  values obtained

from the DNA standard curve ranged from 0.27 to 1.4% (Table 1).

#### Validation of the CSBV TaqMan PCR method on clinical samples

The 37 collected clinical samples were tested to determine the feasibility of the *TaqMan* PCR assay. At the same time, all

**Table 1.** Reproducibility of *TaqMan* minor groove binder (MGB) probe fluorescence real-time quantitative polymerase chain reaction (PCR).

| No. of CSBV copies (amount of cDNA per mix) | MGB-labelled CSBV probe |        |
|---------------------------------------------|-------------------------|--------|
|                                             | $C_T$ value             | CV (%) |
| $5 \times 10^6$ copies/ $\mu$ l             | $14.90 \pm 0.03383$     | 0.39   |
| $5 \times 10^5$ copies/ $\mu$ l             | $17.95 \pm 0.04509$     | 0.44   |
| $5 \times 10^4$ copies/ $\mu$ l             | $21.26 \pm 0.1715$      | 1.4    |
| $5 \times 10^3$ copies/ $\mu$ l             | $24.96 \pm 0.08083$     | 0.57   |
| $5 \times 10^2$ copies/ $\mu$ l             | $27.63 \pm 0.04055$     | 0.27   |
| $5 \times 10^1$ copies/ $\mu$ l             | $31.15 \pm 0.09045$     | 0.73   |

The reproducibility of the Chinese sacbrood virus (CSBV) *TaqMan* PCR assay was demonstrated by evaluating the variability of the  $C_T$  values obtained after amplification of 10-fold serial dilutions of the plasmid DNA standard ranging from  $10^1$  to  $10^6$  copies per reaction in triplicate during the same experiment. The coefficient of variation (CV) of the mean  $C_T$  values obtained for the DNA standard curve ranged from 0.27 to 1.4%.

doi:10.1371/journal.pone.0052670.t001

mentioned samples were subjected to conventional RT-PCR and electron microscopy. As shown in Table 2 (Fig. 3), the LNQY-1, LNJJZ-3, LNYK-4 and JLHN samples presented severe signs of sacbrood disease and all three methods yielded positive results. The LNQY-5 and LNSZ-2 samples tested positive using conventional RT-PCR and the *TaqMan* RT-PCR method, however the samples were negative by electron microscopy and for clinical symptoms, The LNYK-6 samples tested positive using

the *TaqMan* RT-PCR method, however the samples were negative by electron microscopy and conventional RT-PCR (Table 2). Furthermore, DWV, BQCV, ABPV and CBPV were also detected by RT-PCR, but these viruses were not detected by other means (Fig. 4).

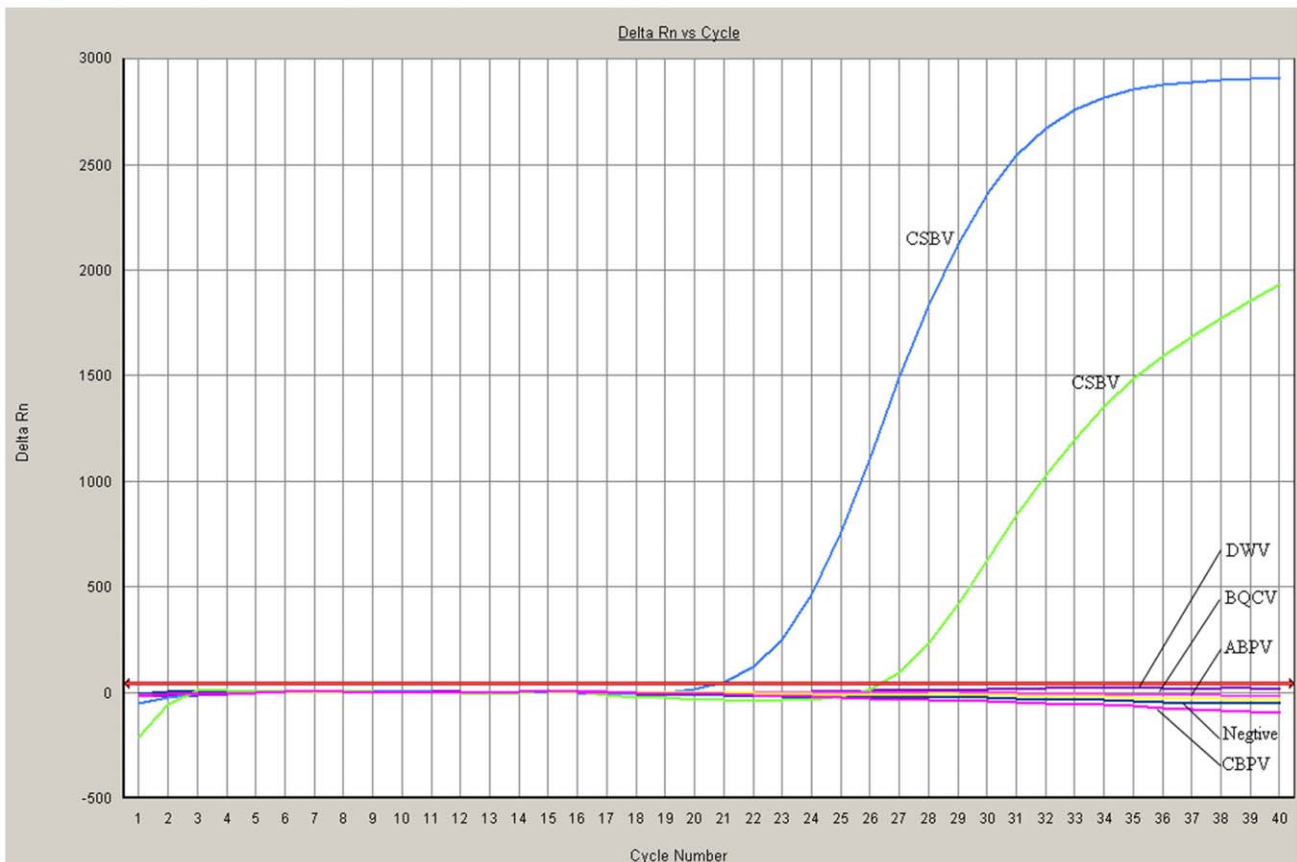

**Figure 4. Comparison of the specificity of Chinese sacbrood virus (CSBV) *TaqMan* PCR assay for CSBV detection.** Chinese sacbrood virus strains gave a positive reaction using the *TaqMan* PCR assay method, no cross-reactivity with other clinically related viruses, including deformed wing virus (DWV), black queen cell virus (BQCV), acute bee paralysis virus (ABPV), and chronic bee paralysis virus (CBPV), was detected.

**Table 2.** Detection of 37 Chinese sacbrood virus (CSBV) clinical samples: of *TaqMan* minor groove binder (MGB) probe fluorescence real-time quantitative PCR, reverse transcriptase polymerase chain reaction (RT-PCR) and electron microscopy methods.

| Samples | Area of collecting sample | RT-PCR | <i>TaqMan</i> MGB | CSBV copies                    | EM |
|---------|---------------------------|--------|-------------------|--------------------------------|----|
| LNQY-1  | Qingyuan                  | +      | +                 | 3.59×10 <sup>5</sup> copies/μl | +  |
| LNQY-2  | Qingyuan                  | -      | -                 |                                | -  |
| LNQY-3  | Qingyuan                  | -      | -                 |                                | -  |
| LNQY-4  | Qingyuan                  | -      | -                 |                                | -  |
| LNQY-5  | Qingyuan                  | +      | +                 |                                | -  |
| LNQY-6  | Qingyuan                  | -      | -                 |                                | -  |
| LNJZ-1  | Jinzhou                   | -      | -                 |                                | -  |
| LNJZ-2  | Jinzhou                   | -      | -                 |                                | -  |
| LNJZ-3  | Jinzhou                   | +      | +                 |                                | +  |
| LNJZ-4  | Jinzhou                   | -      | -                 |                                | -  |
| LNJZ-5  | Jinzhou                   | -      | -                 |                                | -  |
| LNTL-1  | Tieling                   | -      | -                 |                                | -  |
| LNTL-2  | Tieling                   | -      | -                 |                                | -  |
| LNTL-3  | Tieling                   | -      | -                 |                                | -  |
| LNTL-4  | Tieling                   | -      | -                 |                                | -  |
| LNTL-5  | Tieling                   | -      | -                 |                                | -  |
| LNKY-1  | Yingkong                  | -      | -                 |                                | -  |
| LNKY-2  | Yingkong                  | -      | -                 |                                | -  |
| LNKY-3  | Yingkong                  | -      | -                 |                                | -  |
| LNKY-4  | Yingkong                  | +      | +                 |                                | +  |
| LNKY-5  | Yingkong                  | -      | -                 |                                | -  |
| LNKY-6  | Yingkong                  | -      | +                 |                                | -  |
| LNDL-1  | Dalian                    | -      | -                 |                                | -  |
| LNDL-2  | Dalian                    | -      | -                 |                                | -  |
| LNDL-3  | Dalian                    | -      | -                 |                                | -  |
| LNDL-4  | Dalian                    | -      | -                 |                                | -  |
| LNDL-5  | Dalian                    | -      | -                 |                                | -  |
| LNLZ-1  | Liaozhong                 | -      | -                 |                                | -  |
| LNLZ-2  | Liaozhong                 | -      | -                 |                                | -  |
| LNLZ-3  | Liaozhong                 | -      | -                 |                                | -  |
| LNLZ-4  | Liaozhong                 | -      | -                 |                                | -  |
| LNLZ-5  | Liaozhong                 | -      | -                 |                                | -  |
| LNSZ-1  | Suizhong                  | -      | -                 |                                | -  |
| LNSZ-2  | Suizhong                  | +      | +                 |                                | -  |
| JLHN    | Huinan                    | +      | +                 |                                | +  |
| JLJA    | Jian                      | -      | -                 |                                | -  |
| JLBC    | Baicheng                  | -      | -                 |                                | -  |

doi:10.1371/journal.pone.0052670.t002

## Discussion

Quantitative real-time polymerase chain reaction (qRT-PCR), is a laboratory technique based on PCR that is used to amplify and simultaneously quantify a targeted DNA molecule. The standard DNA probes are labeled at the 5' end with a fluorochrome reporter (usually 6-carboxyfluorescein [6-FAM]) and a fluorochrome quencher (6-carboxy-tetramethyl-rhodamine [TAMRA]) at the 3' end. A new technology of qRT-PCR that uses MGB probes [15] for fluorescence quantitative PCR, has been developed recently for the detection and quantitation DNA molecules. The

DNA probes with the MGB groups form extremely stable duplexes with single-stranded DNA targets, and therefore allow shorter probes to be used for hybridization-based assays. MGB probes have higher melting temperature ( $T_m$ ) and increased specificity when compared with unmodified DNA, especially when a mismatch occurs in the MGB region of the duplex. The fluorogenic MGB probes were more specific for single-base mismatches and fluorescence quenching was more efficient, and therefore gave increased sensitivity. In summary, MGB probes were more sequence specific than standard DNA probes, especially for single-base mismatches at elevated hybridization temperatures.

In this paper, a *TaqMan* MGB probe fluorescence real-time quantitative PCR assay was developed for the detection and quantitation of CSBV. Kerstin Wernike [16] describe a *TaqMan* MGB probe fluorescence real-time quantitative PCR assay for the detection of SBV, However the *TaqMan* MGB hasn't been evaluated. This paper is the first to describe a *TaqMan* MGB probe fluorescence real-time quantitative PCR assay for the especially detection and quantitation of CSBV in honey bees.

The *TaqMan* MGB probe with primers specific for the CSBV VP1 gene was used. The standard curve generated with the plasmid that contained a partial sequence of the CSBV genome showed that quantitation of this genome was linear over six orders of magnitude. The efficiency of the standard curve and its good correlation was confirmed. Quantitation of the positive control from CSBV-infected larvae gave similar results for both methods compared to the values obtained by UV spectrometry. These results validated the use of the DNA standard curve to quantify CSBV in bee samples. The limit of detection of this *TaqMan* PCR method was 50 CSBV genome equivalent copy numbers, which represented an improvement in the limit of detection by the

conventional the PCR method developed previously in our laboratory [5], for which the limit of detection was  $5 \times 10^3$  CSBV copies. The reproducibility of several experiments showed the high reproducibility of the method for the standard curve (0.27 to 1.4%), and for the efficiency of cDNA synthesis from the positive control (0.95%). The feasibility of the *TaqMan* PCR assay was validated by detection of 37 clinical samples using conventional PCR and the *TaqMan* PCR. The *TaqMan* PCR assay was more sensitivity than conventional PCR.

In summary, in this paper we provide a quantitative description of CSBV infection in larvae in China. Our data demonstrated that real-time quantitative RT-PCR is a specific, sensitive, robust, and reproducible assay with practical applications in the diagnosis of honey bee virus diseases and analysis of virus infection.

## Author Contributions

Conceived and designed the experiments: MM SY. Performed the experiments: LJ LY LL. Analyzed the data: MM SY. Wrote the paper: MM SY.

## References

- Ritter W (1996) Diagnostik und Bekämpfung von Bienenkrankheiten. Gustav Fischer Verlag Jena. Stuttgart. Germany, 104–114.
- Bailey L (1975) Recent research on honeybee viruses. *Bee World* 56: 55–64.
- Bailey L (1976) Viruses attacking the honeybee. *Adv. Virus Res* 20: 271–304.
- Wang DI, Moller FE (1970) The division of labor and queen attendance behaviour of nosema-infected worker honey bees. *J. Econ. Entomol* 63: 1539–1541.
- Anderson DL, Gibbs AJ (1989) Transpuparial transmission of Kashmir bee virus and sacbrood virus in the honeybee (*Apis mellifera*). *Ann. Appl. Biol* 114: 1–7.
- Mingxiao M, Ming L, Chunying Y, Pengfei L, Yibo Z, et al. (2010) Development of a RT-PCR method for determination of Chinese sacbrood virus. *Chin. J. Biol* 23: 425–427 (in chinese).
- Yan X, Chen J, Han R (2009) Detection of Chinese sacbrood virus (CSBV) in *Apis cerana* by RT-PCR method. *Sociobiology*, 53: 687–694.
- Mingxiao M, Chen M, Mng L, Wang S, Song Y, et al. (2011) Loop-mediated isothermal amplification for rapid detection of Chinese sacbrood virus. *J. Virol. Methods* 176(1–2): 115–119.
- Chen YP, Higgins JA, Feldlaufer MF (2005) Real-time quantitative reverse-time transcription-PCR analysis of deformed wing virus infection in the honeybee virus (DWV) (*Apis mellifera* L.). *Appl. Environ. Microbio* 71: 436–441.
- Chantawannakul P, Ward L, Boonham N, Brown M (2006) A scientific note on the detection of honey bee viruses using real-time PCR (*TaqMan*) in Varroa mites collected from a Thai honeybee (*Apis mellifera*) apiary. *J. Invertebr. Pathol* 91: 69–73.
- Blanchard P, Ribiere M, Celle O, Lallemand P, Schurr F, et al. (2007) Evaluation of a real-time two-step RT-PCR assay for quantitation of chronic bee paralysis virus (CBPV) genome in experimentally-infected bee tissues and in life stages of a symptomatic colony. *J. Virol. Methods* 141: 7–13.
- Kukielka D, Esperón F, Higes M, Sánchez-Vizcaino JM (2008) A sensitive one-step real-time RT-PCR method for detection of deformed wing virus and black queen cell virus in honeybee *Apis mellifera*. *J. Virol. Methods* 147: 275–278.
- Kukielka D, Sánchez-Vizcaino JM (2009) One-step real-time quantitative PCR assays for the detection and field study of sacbrood honeybee and acute bee paralysis viruses. *J. Virol. Methods* 161: 240–246.
- Sambrook J, Russell DW (2001) *Molecular Cloning: A Laboratory Manual*. third ed. Cold Spring Harbor Laboratory Press. Cold Spring Harbor. N.Y.
- Kutyavin IV, Afonina IA, Mills A, Gorn VV, Lukhtanov EA, et al. (2001) 3'-Minor groove binder-DNA probes increase sequence specificity at PCR extension temperatures *Nucleic Acids Res* 28(2): 655–661.
- Wernike K, Hoffmann B, Dauber M, Lange E, Schirmer H, et al. (2010) Detection and Typing of Highly Pathogenic Porcine Reproductive and Respiratory Syndrome.
